# Supplementary material for: Risk factors of bloodstream infection in erythroderma from atopic dermatitis, psoriasis, and drug reactions: a retrospective observational cohort study
Source: PeerJ. 2024 Jul 11;12:e17701. doi: 10.7717/peerj.17701 (PMC11246620; doi:10.7717/peerj.17701)
Supplement: Supplemental Information 1 [file peerj-12-17701-s001.xlsx]

## Sheet: Sheet2
	Disease	SEX	Duration days	age	chilling	Diabetes	Hypertension	Coronary Disease	Kidney Disease	Liver Disease	Temperature（℃）	steroid history	CRP	WBC	PCT	N/L	ESR	IL-6	LDH	ALB	skin bacteria	Blood cultures
1	Atopic disease	1	730	65	2	2	2	2	2	2	36.4	2	11.2	9.84		2.28788	39			36.8	2	negative
2	Psoriasis	1	10	82	1	2	1	2	2	2	36.5	2	5	10.39	0.08	2.76496	16		426	35	2	negative
3	Psoriasis	1	10	50	2	2	2	2	2	2	37.2	1	<2.5	16.5	0.04	6.7069	4		177	40	2	negative
4	Atopic disease	2	30	11	2	2	2	2	2	2	36.6	1		11.65		4.90323			241	44.7	2	negative
5	Drug reaction	2	5	73	2	1	1	2	1	1	37.7	2	>15	20.46	1.53	2.00333	24		721	26	2	negative
6	Drug reaction	2	3	49	2	1	1	2	2	2	39.1	2	13	6.07	0.38	2.64885	32		274	35	2	negative
7	Psoriasis	1	30	48	2	2	2	2	2	2	37.7	2	26	18.17	0.23	19.5122	28	6.81	310	37	2	negative
8	Psoriasis	1	15	79	2	2	2	2	2	2	36.6	1	18	9.41	0.33	7.375	20		198	36	2	negative
9	Psoriasis	1	7	53	2	2	2	2	2	2	38	1	29	10.47	0.1	6.3622	20		274	40	2	negative
10	Drug reaction	1	5	61	2	2	2	2	1	2	37.5	2	12	14.59	0.56	9.05833	6		404	30	2	negative
11	Drug reaction	1	60	61	2	2	2	2	2	2	36.6	1	6	8.85	0.06	3.34574	2		316	35	2	negative
12	Atopic disease	1	365	86	2	2	1	2	2	2	36.4	2	8	5.77		5.8254	19		570	37	2	negative
13	Psoriasis	1	30	65	2	1	2	2	2	2	37.4	2	17	7.36	0.57	4.40171			310	36	2	negative
14	Drug reaction	1	14	61	1	2	1	2	2	2	36.7	1		7.72	2.53	2.14667	8		376	38.1	2	negative
15	Drug reaction	1	14	60	1	2	2	2	2	2	37.2	2	48	24.79	0.5	1.11828	2		775	31	2	negative
16	Psoriasis	2	60	52	2	2	2	2	2	2	37.2	2	3	7.83	0.03	2.51707	18	6.45		43	2	negative
17	Psoriasis	1	30	48	2	1	1	2	2	2	41	1	14	8.21	<0.5	3.32222	1.6	12.07	183	34	2	negative
18	Psoriasis	1	7	46	2	1	2	2	2	2	37.2	1	23	15.08	0.03	17.0875			253	31	2	negative
19	Psoriasis	1	10	39	2	2	2	2	2	2	36.5	2	3	8.84		2.97849				32.7	2	negative
20	Atopic disease	1	3	58	2	2	2	2	2	2	36	1		6.48		8.26154				35.9	2	negative
21	Atopic disease	1	7	80	2	2	2	2	2	2	36.7	1	35	9.04	0.62	2.1				0	2	negative
22	Atopic disease	1	5	57	2	2	2	2	2	2	37.4	2		11.18		2.11296				31.6	2	negative
23	Atopic disease	1	10	58	2	2	2	2	2	2	36.4	1	16	9.14		4.15972			332	36	2	negative
24	Drug reaction	2	90	62	2	1	1	2	1	2	37.2	1	9	8	0.48	28.5769			286	30	1	BSI positive
25	Atopic disease	2	14	34	2	2	2	2	2	2	36.3	2		9.24		5.54545	8	3.14		38	2	negative
26	Psoriasis	1	30	70	2	1	2	2	2	2	36.6	1	3	7.48	0.02	3.12319	63	17.79	315	29.4	2	negative
27	Drug reaction	1	2920	38	2	2	2	2	2	2	36.8	1	28	11.23	0.02	5.71975	25	68.29	296	30	1	negative
28	Psoriasis	1	730	55	2	1	1	2	2	2	36.9	2	0.6	9.34		4.31098		9.72	175	41.3	2	negative
29	Drug reaction	1	2920	38	2	2	2	2	2	2	36.5	1		14.24	0.07	5.23158			267	31	1	negative
30	Drug reaction	1	2920	38	2	2	2	2	2	2	37.8	1	86	4.01	1.64	3.41791	106		181	27	1	BSI positive
31	Atopic disease	1	3	63	2	2	2	2	2	2	36.8	2	10	14.8		4.80423	9	57.37	379	28	2	negative
32	Drug reaction	1	6	60	2	2	2	2	2	2	37.1	2	9	4.11	0.03	6.46809	7	6.59	166	32.2	2	negative
33	Drug reaction	1	30	44	2	2	2	2	2	2	37	1	15	18.33	0.07	31.7692	13	28.61	294	28	2	negative
34	Drug reaction	1	2920	39	2	2	2	2	2	2	38.6	1	171	5.69	0.66	2.42748			176	27	1	negative
35	Drug reaction	1	13	59	2	2	2	2	2	2	36.3	2	98	11.94	0.39	0.81	2	60.83	285	18	1	negative
36	Atopic disease	1	7	48	2	2	2	2	2	2	36.8	1	31	7.07	<0.02	2.72189	8		529	33	1	negative
37	Atopic disease	2	60	75	2	2	1	2	2	2	36.3	2	5	8.46		3.71429	32	95.59	327	41	2	negative
38	Drug reaction	2	21	86	2	1	1	2	2	2	36.5	1	0.6	5.84	0.34	2.81429	40	7.14	480	26	2	negative
39	Atopic disease	1	60	66	2	2	1	2	2	2	37.1	1	9	7.82	0.17	4.53435	10	2.75	475	34	1	negative
40	Drug reaction	1	21	64	2	2	1	2	1	2	36.8	2	12	7.31	0.4	3.7541	28	17.98	363	36	2	negative
41	Atopic disease	1	30	68	1	1	2	2	2	2	38.2	1	52	8.9	<0.5	1.61468	13	5.3	261	13	2	negative
42	Psoriasis	1	30	82	2	2	2	2	2	2	37.1	2	46	8.39	0.05	5.40351	96		212	41	2	negative
43	Atopic disease	1	10	51	1	2	2	2	2	2	37	2	46	13.97	0.1	2.80303			546	35	2	negative
44	Atopic disease	1	10	71	1	2	2	2	2	2	37.4	2	7	11.09	0.13	4.03226				41	1	negative
45	Atopic disease	2	5	76	2	2	1	2	2	2	36.5	2	1	7.31	0.06	3.25342			313	34	2	negative
46	Atopic disease	1	30	63	1	1	1	2	2	2	40.4	1	33	10.75	2.21	12.1899	49		194	23	1	BSI positive
47	Drug reaction	1	45	55	1	2	2	2	2	2	36.4	2	155	14.27	8.54	28.7174	61				1	negative
48	Atopic disease	1	10	69	2	2	2	2	2	2	37.2	2	24	10.05	0.11	2.78621	3	17.07	438	36	1	BSI positive
49	Psoriasis	1	183	49	2	2	2	2	2	2	37.2	2	17	17.24	0.09	7.63736	17	54.07	176	38	1	negative
50	Atopic disease	1	450	63	2	1	2	2	2	2	36.5	2	0.6	7.62		4.84466	15		267	46	2	negative
51	Psoriasis	2	180	20	2	2	2	2	2	2	36.5	2	3	9.08	0.04	1.73611	13	6.06		34.8	2	negative
52	Psoriasis	1	30	54	1	2	2	2	2	2	36.5	2	3	7.57	0.05	3.12575	55	11.98	230	37	2	negative
53	Drug reaction	1	1	54	1	1	1	2	1	2	38.5	2	39	6.85	7.58	1.5515			175	28	1	BSI positive
54	Psoriasis	2	21	54	2	2	2	2	2	2	37.3	2	0.6	6.27	0.05	2.73154	13	2.29	142	37	2	negative
55	Atopic disease	1	60	69	2	2	1	2	2	2	36.7	2	0.6	9.5	0.04	7.34091			718	34	1	BSI positive
56	Atopic disease	1	20	67	2	1	2	2	2	2	36.8	2	33	13.26	0.14	4.17273	21	40.56		29.7	2	negative
57	Psoriasis	1	1095	54	2	2	2	2	2	2	36.6	2	38	10.16	0.06	2.53846	86			29.3	2	negative
58	Drug reaction	2	10	20	2	2	2	2	2	2	37.4	1		12.12		4.39614	24	<1.5		36.3	2	negative
59	Drug reaction	1	3	56	2	2	2	2	2	2	36.7	2	9	7.74	0.04	5.66082	7	3.82	438	32	2	negative
60	Psoriasis	1	4015	13	2	2	2	2	2	2	36.9	1	126	16.91	0.11	9.92857	88	200.4		33.3	1	negative
61	Atopic disease	1	60	18	2	2	2	2	2	2	37.5	2	4	9.56		3.1875		4.91		40.1	2	negative
62	Drug reaction	1	7	74	2	2	1	1	2	2	36.9	2		10.46		6.44444	5	11.62		33.2	2	negative
63	Psoriasis	1	10	54	2	2	2	2	2	2	36.5	2		10.42		2.03333	24	3.8		39.3	2	negative
64	Atopic disease	2	4	8	2	2	2	2	2	2	37.5	2	2	9.13		0.926036		7.57		33.3	1	negative
65	Atopic disease	1	5	72	2	2	2	2	2	2	36	1	135	5.07	0.32	2.99065		13		31.1	1	negative
66	Drug reaction	1	7	70	2	2	1	2	2	2	36.8	2		7.5		3.39437		25.72		30.7	2	negative
67	Drug reaction	1	9	70	2	1	2	2	2	2	37	2	20	10.62		15.2281	26	30.45		36.8	2	negative
68	Atopic disease	1	90	79	2	2	2	2	2	2	37.8	1	49	9.72	0.33	1.64157	9	6.78	324	21	1	negative
69	Psoriasis	1	1095	56	2	1	1	2	2	2	36.8	2	2	8.26		4.83077	29	9.7	127	35	2	negative
70	Atopic disease	1	90	72	2	2	2	2	2	2	36.9	2	9	4.98		2.5678	54		320	39	2	negative
71	Psoriasis	1	30	66	2	2	2	2	2	2	37.5	1	17	10	0.67	6.50877	8		168	28	2	negative
72	Atopic disease	1	365	66	2	2	2	2	2	2	36.1	2		13.02		4.06044			548	27	1	negative
73	Atopic disease	1	5	73	2	2	1	2	2	2	36.5	2	0.6	9.46		2.685			313	37	2	negative
74	Drug reaction	2	30	75	2	2	2	2	2	2	37.2	1		10.75	0.11	6.78182		3.07	679	26	2	negative
75	Atopic disease	1	7	18	2	2	2	2	2	2	36.8	2		6.4		1.79167		4.8		41.6	2	negative
76	Atopic disease	1	60	65	2	2	2	2	2	2	36	2	3	6.6		2.60833	27			43.1	2	negative
77	Atopic disease	1	7	59	2	2	1	1	2	2	36.8	2		13.67		2.03125	19	3.52		37.1	2	negative
78	Psoriasis	1	14	8	2	2	2	2	2	2	37.7	2	99	24.01	0.18	9.87745	79	61.28	193	36	1	negative
79	Psoriasis	1	15	55	2	2	1	2	2	2	37.1	2	0.6	10.04	0.15	4.17647			233	31	2	negative
80	Psoriasis	1	90	68	2	2	2	2	2	2	37.4	2	9	7.49		3.85926	42		208	41	2	negative
81	Atopic disease	1	30	79	2	2	2	2	2	2	36.8	2		7.58	49.21	5.625	6		408	31.2	1	negative
82	Psoriasis	1	15	55	2	2	2	2	2	2	36.4	2		10.89		2.69231			173	36.6	2	negative
83	Atopic disease	1	7	83	2	2	2	2	2	2	36.8	2	83	9.08	0.17	12.3281	3	5.97	336	28.7	2	negative
84	Drug reaction	2	5	39	1	2	1	2	1	2	38.2	1	70	13.82	6.2	3.69597	10		262	24	1	negative
85	Psoriasis	1	730	28	2	2	2	2	2	1	36.6	2		8.95	0.04	2.38197			267	41	2	negative
86	Psoriasis	2	14	24	1	2	2	2	2	2	36.5	1	50	25.51	0.14	2.3709	80	2.76	291	35.8	2	BSI positive
87	Atopic disease	2	7	26	2	2	2	2	2	2	36.5	2	3	8.88		1.63636	14			38.3	2	negative
88	Atopic disease	1	300	67	2	2	1	2	2	2	36.5	1	24	10.24		5.52672				32.8	2	negative
89	Atopic disease	1	90	60	2	2	2	2	2	2	36.8	1		23.49		8.58779			522	34.3	1	negative
90	Psoriasis	1	30	52	1	2	2	2	2	2	40	1	129	15.54	11.1	6.63054	88	137.9		25.4	1	negative
91	Psoriasis	1	14	22	2	2	2	2	2	2	38.4	2	57	11.4	0.1	9.30208	48	129.5	185	31	2	negative
92	Atopic disease	1	3	74	2	2	2	2	2	2	36.4	2	0.6	10.68		2.97696	15	8.2	323	37	1	negative
93	Psoriasis	1	5	21	2	2	2	2	2	2	40	2	97	13.12	0.08	4.60194		34.36	154	34	2	negative
94	Atopic disease	2	60	11	2	2	2	2	2	2	36.8	2	0.6	9.63	0.04	2.49065	7	8.66		37.8	1	negative
95	Psoriasis	1	4	39	2	2	2	2	2	2	38.2	2	101	6.89	0.09	3.2	70	27		33.4	1	negative
96	Drug reaction	1	30	68	2	2	1	1	1	2	36.6	1	70	8.67	0.75	4.10448		2017-11-29	408	27	2	negative
97	Atopic disease	1	120	76	2	2	2	2	2	2	36.8	2	12	12.99	0.1	2.7549		15.71		34.2	1	negative
98	Atopic disease	2	20	47	2	2	2	2	2	2	37.2	2	26	13.59	0.12	1.6911	15		613	28	1	negative
99	Atopic disease	1	365	53	2	2	2	2	2	2	37.5	2	15	5.98	0.08	4.23333	2017-12-12		302	31	1	BSI positive
100	Atopic disease	1	60	52	2	1	2	2	2	2	37.2	1	36	11.73	0.1	6.11842	27	2018-12-25	405	40	1	negative
101	Atopic disease	1	7	70	2	2	2	2	2	2	37.8	2	20	16.06	0.08	5.23881	64		236	34	1	negative
102	Psoriasis	1	90	54	2	2	1	2	2	2	36.8	2	0.6	12.74	0.05	4.72396		2018-01-05	208	36	1	negative
103	Drug reaction	1	120	66	2	2	2	2	2	2	36.2	2		12.8	0.18	7.92366	7		417	0	1	negative
104	Atopic disease	1	14	52	2	2	2	2	2	2	36.8	1	6	10.98	0.04	2.33571		5.15	418	46	1	negative
105	Drug reaction	2	3	39	2	2	1	2	1	2	38.2	2	14.45	16.88	1.22	20.6351			422	40	1	negative
106	Drug reaction	1	150	66	2	1	1	2	2	2	36.8	1		12.57	0.09	5.84211	17			26.7	2	negative
107	Psoriasis	1	30	72	2	2	1	2	2	2	36.8	2	13	7.5		3.92857	9	5.44		32.5	2	negative
108	Psoriasis	1	4	60	2	2	1	2	2	2	38	1	210.21	21.49	0.77	19.4854	79		219	29	1	negative
109	Psoriasis	2	10	50	2	2	2	2	2	2	36.8	1	1.17	12.5	0.04	2.98282	12		266	33	1	negative
110	Atopic disease	1	1825	64	2	1	1	1	2	2	36.1	2	6.75	7.15	0.04	5.69118	14		276	32	1	negative
111	Psoriasis	1	365	60	2	2	2	2	2	2	36.2	2	26.7	5.82	<0.02	4.11881	47		183	36	1	negative
112	Atopic disease	1	240	79	2	2	2	2	2	2	36	2	5.62	6.87	0.12	3.58559	63		249	36	2	negative
113	Psoriasis	1	5	44	2	2	2	2	2	2	39	2	93.5	20.69	0.1	15.887	36	91.24	289	37	1	negative
114	Psoriasis	1	365	44	2	2	2	2	2	2	36.9	1	7.12	5.56	0.07	2.85246		43.12	203	22	1	negative
115	Psoriasis	1	1825	67	2	2	2	2	2	2	37.6	2	63.98	4.87	0.24	2.09489	32	89.18	157	28	1	negative
116	Psoriasis	1	120	58	2	1	1	2	2	2	36.6	2	9.58	8.27	0.07	5.36752		8.12		38.1	2	negative
117	Drug reaction	1	11	56	1	1	1	1	1	2	36	1	128.4	10.19	12.03	18.0294			321	26	1	BSI positive
118	Psoriasis	1	330	50	1	1	2	2	1	2	37.5	1	136.76	10.39	0.5	12.6338	41		185	30	1	negative
119	Psoriasis	1	7	48	1	2	1	2	2	2	37	2	55.76	8.92	0.04	3.19048				31.2	1	negative
120	Drug reaction	1	120	70	2	2	2	2	2	2	37.3	1	17.24	11.62	0.06	4.17978	60	11.96	631	32	2	negative
121	Psoriasis	1	15	26	2	2	2	2	2	2	37	2	16.63	7.29	0.03	1.62551	15	7.2		40.1	2	negative
122	Psoriasis	1	14	49	1	2	1	2	2	2	36.8	2	10.26	10.04		3.00922	28			36.2	2	negative
123	Atopic disease	1	30	54	2	2	2	2	2	2	36.8	2	3.85	7.92	0.04	2.05076	13		241	34.9	2	negative
124	Drug reaction	1	15	80	1	2	2	2	1	2	37.7	1	70.48	10.17	0.08	2.66518	17	1.62	305	28	1	BSI positive
125	Atopic disease	1	10950	78	2	2	1	2	2	2	36.2	2	74.16	11.87	0.09	7.67778	22		535	31	2	negative
126	Atopic disease	2	20	18	2	2	2	2	2	2	36.5	2	13.86	7.75	0.04	2.57962				34.1	1	negative
127	Drug reaction	1	30	80	1	2	2	2	1	2	36.8	1	15.13	13.89	0.08	2.9572		180.99	332	28.3	1	BSI positive
128	Atopic disease	1	60	61	2	2	1	2	2	2	36.9	2	20.8			1.79487	24				2	negative
129	Atopic disease	1	90	64	1	2	2	2	2	2	36.4	1	26.94	7.63	0.11	3.77692			282	40	2	negative
130	Atopic disease	1	90	75	2	1	1	2	2	2	37.3	2	16.62	7.57	0.11	3.99029	40			31.7	1	negative
131	Psoriasis	1	180	32	2	2	2	2	2	2	36.8	2		6.1	0.1	1.82424	4			25.6	2	negative
132	Psoriasis	1	14	44	2	2	2	2	2	2	37.7	2	79.37	10.48	0.04	3.96196	37		187	36	1	negative
133	Atopic disease	2	20	18	2	2	2	2	2	2	37.2	1	6.06	9.32	0.05	3.09804				35.2	2	negative
134	Atopic disease	1	60	85	2	2	1	2	2	2	36.4	1	4.79	7.81	0.1	3.57353				36	1	negative
135	Atopic disease	1	90	85	2	2	2	2	2	2	36.8	2	2.17	10.06	0.06	1.73856	7		267	36	1	negative
136	Drug reaction	1	2	41	2	2	2	2	2	2	36.8	1	138.44	18.85	0.91	10.4577	8	8.77	319	41	1	negative
137	Drug reaction	1	30	56	2	2	2	2	2	2	36.9	1	6.52	5.68	0.07	3.30556	8	4.61	638	37	1	negative
138	Atopic disease	1	150	75	2	2	2	2	2	2	36.9	2	77.14	13.4	0.21	3.80723	43		203	22	1	negative
139	Psoriasis	1	30	40	2	2	2	2	2	2	36.8	2		8.92		1	23	0.67	157	37.6	2	negative
140	Psoriasis	1	365	71	2	1	2	2	2	2	36.8	1	5.24	11.18	0.14	1.39234	2	2.81	211	32	1	negative
141	Psoriasis	1	30	41	2	2	2	2	2	2	37.3	2	29.66	10.76	0.11	5.94891	18		241	43	1	negative
